# Supplementary material for: TaNAC020 homoeologous genes are associated with higher thousand kernel weight and kernel length in Chinese wheat
Source: Front Genet. 2022 Aug 26;13:956921. doi: 10.3389/fgene.2022.956921 (PMC9458977; doi:10.3389/fgene.2022.956921)
Supplement: Supplementary file 1 [file DataSheet1.xlsx]

## Sheet: Supplementary Table 1
	Table S1: Wheat accessions used in this study
Code	Name/Accession	Species	Genome	TaNAC-7A	TaNAC-7B
H001	UR-201	Triticum urartu	AA	Hap-7A-3
H002	UR-202	Triticum urartu	AA	Hap-7A-3
H003	UR-203	Triticum urartu	AA	Hap-7A-3
H004	UR-204	Triticum urartu	AA	Hap-7A-3
H005	UR-205	Triticum urartu	AA	Hap-7A-3
H006	MO2	Triticum urartu	AA	Hap-7A-3
H007	MO5	Triticum urartu	AA	Hap-7A-3
H008	UR-200	Triticum urartu	AA	Hap-7A-3
H009	UR-209	Triticum urartu	AA	Hap-7A-3
H010	UR-205	Triticum urartu	AA	Hap-7A-3
H011	UR-208	Triticum urartu	AA	Hap-7A-3
H012	MO-101	Triticum monococcum	AA	Hap-7A-3
H013	MO-102	Triticum monococcum	AA	Hap-7A-3
H014	BO-104	T.boeoticum Bioss	AA	Hap-7A-3
H015	BO-103	T.boeoticum Bioss	AA	Hap-7A-3
H016	BO-8	T.boeoticum Bioss	AA	Hap-7A-3
H017	Y-2001	Aegilops speltoides	BB		Hap-7B-1
H018	Y-2017	Aegilops speltoides	BB		Hap-7B-1
H019	Y-2041	Aegilops speltoides	BB		Hap-7B-1
H020	Y2008	Aegilops speltoides	BB		Hap-7B-1
H021	Y2009	Aegilops speltoides	BB		Hap-7B-1
H022	Y2023	Aegilops speltoides	BB		Hap-7B-1
H023	Y2022	Aegilops speltoides	BB		Hap-7B-1
H024	Y2019	Aegilops speltoides	BB		Hap-7B-1
H025	Y2018	Aegilops speltoides	BB		Hap-7B-1
H026	Y2020	Aegilops speltoides	BB		Hap-7B-1
H027	Y2021	Aegilops speltoides	BB		Hap-7B-1
H028	Y2035	Aegilops speltoides	BB		Hap-7B-1
H029	Y-85	Aegilops tauschii	DD
H030	Y-296	Aegilops tauschii	DD
H031	AE-38	Aegilops tauschii	DD
H032	AE-37	Aegilops tauschii	DD
H033	AE-46	Aegilops tauschii	DD
H034	AE-69-1	Aegilops tauschii	DD
H035	AE-69-2	Aegilops tauschii	DD
H036	Y225-1	Aegilops tauschii	DD
H037	Y225-2	Aegilops tauschii	DD
H038	Y225-3	Aegilops tauschii	DD
H039	Y225-4	Aegilops tauschii	DD
H040	Kronos	Triticum turgidum	AABB	Hap-7A-1	Hap-7B-1
H041	DM-50	Triticum dicoccum	AABB	Hap-7A-3	Hap-7B-1
H042	DM-49-1	Triticum dicoccum L.	AABB	Hap-7A-3	Hap-7B-1
H043	DM-49-2	Triticum dicoccum L.	AABB	Hap-7A-3	Hap-7B-1
H044	DM-51-1	Triticum dicoccum L.	AABB	Hap-7A-3	Hap-7B-1
H045	DM-51-2	Triticum dicoccum L.	AABB	Hap-7A-3	Hap-7B-1
H046	PS-5-1	Triticum dicoccum L.	AABB	Hap-7A-3	Hap-7B-1
H047	PS-5-2	Triticum dicoccum L.	AABB	Hap-7A-3	Hap-7B-1
H048	DS10	Triticum dicoccoides Koern	AABB	Hap-7A-3	Hap-7B-1
H049	DS6	Triticum dicoccoides Koern	AABB	Hap-7A-3	Hap-7B-1
H050	DS-10-1	Triticum dicoccoides Koern	AABB	Hap-7A-2	Hap-7B-2
H051	DS-10-2	Triticum dicoccoides Koern	AABB	Hap-7A-2	Hap-7B-2
H052	DS-1 -1	Triticum dicoccoides Koern	AABB	Hap-7A-2	Hap-7B-2
H053	DS-1-2	Triticum dicoccoides Koern	AABB	Hap-7A-2	Hap-7B-2
H054	PO-9-2	Triticum polonicum L.	AABB	Hap-7A-3	Hap-7B-1
H055	PO-9-3	Triticum polonicum L.	AABB	Hap-7A-3	Hap-7B-1
H056	PO-9-4	Triticum polonicum L.	AABB	Hap-7A-3	Hap-7B-1
H057	PS-9	Triticum persicum	AABB	Hap-7A-3	Hap-7B-1
H058	PO-9-1	Triticum polonicum	AABB	Hap-7A-3	Hap-7B-1
H059	PO-9-4	Triticum polonicum L.	AABB	Hap-7A-3	Hap-7B-1
H060	AR-1	Triticum araraticum	AABB	Hap-7A-3	Hap-7B-1
Code	Variety name	Plant height	1000-kernel weight	kernel numbers per spike	Spikelet number per spike
H061	Jinghong 5	118.76	51.638	53.32	19.64
H062	Neimai 11	129.88	38.006	63.24	22
H063	Hongpixiaomai	137.76	31.85	56.92	21.6
H064	Hongjinmai	137.36	28.322	56.88	22
H065	Xiaobaimang	133.32	48.348	49.2	20.12
H066	Zhongyou 9507	99.72	54.96	44.08	20.44
H067	Jinmai 8	99.96	47.042	40.6	18.92
H068	Fengkang 2	99.2	43.96	43.48	20.48
H069	Changzhi 6406	103.52	45.724	45.4	19.88
H070	Mingxian 169	139.68	33.416	49.96	21.32
H071	Honghuazao	142.68	28.654	59	21.56
H072	Sankecun	150.04	54.306	46.08	19
H073	Yangmai 158	89.72	41.79	56.16	20.12
H074	Zhemai 1	110.12	32.726	50.24	19.52
H075	Yangmai	142.68	33.622	52.76	21.88
H076	Guangtou	148.8	38.916	48.84	21.88
H077	Dongnong101	139.92	32.13	47.96	20.08
H078	Mentana	118.04	42.686	51.68	19.32
H079	Suwon 86	68.64	27.936	47.64	19.4
H080	Atlas 86	145.96	46.564	48.72	19.72
H081	Shengen	143.64	34.158	57.2	22.24
H082	Shanglinxiaomai	137.48	36.92	50.32	19.28
H083	Dixiuzao	134.72	49.072	59.84	21.84
H084	Jingyang 60	141.92	31.244	60.68	22.16
H085	Laizhou 953	87.8	50.302	57.44	21.44
H086	Sanyuehuang	125	27.326	54.64	21.36
H087	Mazhamai	129.42	31.96	61.24	21.6
H088	Zijiehong	152.68	47.286	48.76	19.52
H089	Liuyuehuang	133.36	42.832	52.08	21.36
H090	Rikaze 8	119.96	46.922	53.56	20.28
H091	Shanmai	125.42	37.22	42.88	20.84
H092	Ganmai 8	117.08	51.276	60.52	21.92
H093	Xingyi 4	87.24	49.964	61.64	20.64
H094	Zipi	140.92	30.196	58.76	20.36
H095	Baidongmai	131.56	27.862	57.2	22.48
H096	Hongjinbaoyin	137.2	48.672	55.12	23.4
Code	Accession name	Accession type	Wheat region in China
H097	Xiaobaimai	Landrace	Ⅶ
H098	Hongpixiaomai	Landrace	Ⅶ
H099	Dabaipi	Landrace	Ⅶ
H100	Xiaohongpi	Landrace	Ⅶ
H101	Dingxingzhai	Landrace	Ⅶ
H102	Honglidangnianlao	Landrace	Ⅶ
H103	Chunxiaomai	Landrace	Ⅶ
H104	Huoliaomai	Landrace	Ⅶ
H105	Dahongmai	Landrace	Ⅶ
H106	Shaanxibaimai	Landrace	Ⅰ
H107	Niuzhijia	Landrace	Ⅰ
H108	Mahuaban	Landrace	Ⅰ
H109	Jiahongmai	Landrace	Ⅰ
H110	Hongjinmai	Landrace	Ⅰ
H111	Baiqimai	Landrace	Ⅰ
H112	Xiaokouhong	Landrace	Ⅰ
H113	Lanhuamai	Landrace	Ⅰ
H114	Daimanghongmai	Landrace	Ⅰ
H115	Zhuoludongmai	Landrace	Ⅰ
H116	Hongmai	Landrace	Ⅰ
H117	Honglaomai	Landrace	Ⅰ
H118	Youmangbaifu	Landrace	Ⅰ
H119	Hongpidongmai	Landrace	Ⅰ
H120	Qingshiwumang	Landrace	Ⅰ
H121	Youmangbaifu	Landrace	Ⅰ
H122	Baiqiumai	Landrace	Ⅰ
H123	Laomai	Landrace	Ⅰ
H124	Xiaobaimang	Landrace	Ⅰ
H125	Xianmai	Landrace	Ⅲ
H126	Jiangxizao	Landrace	Ⅲ
H127	Honghuazao	Landrace	Ⅲ
H128	Jiangdongmen	Landrace	Ⅲ
H129	Dahuangpi	Landrace	Ⅲ
H130	Chongyanghongmai 1	Landrace	Ⅲ
H131	Zaowutian	Landrace	Ⅲ
H132	Liuzhutou	Landrace	Ⅲ
H133	Chanbuzhi	Landrace	Ⅲ
H134	Zhumaoyuanzitou	Landrace	Ⅲ
H135	Shuilizhan	Landrace	Ⅲ
H136	Huangshuibai	Landrace	Ⅲ
H137	Baipu (luoqing)	Landrace	Ⅲ
H138	Zaoxiaomai	Landrace	Ⅲ
H139	Lanxizaoxiaomai	Landrace	Ⅲ
H140	Wangshuibai	Landrace	Ⅲ
H141	Wuyuanmai	Landrace	Ⅲ
H142	Chejianzi	Landrace	Ⅲ
H143	Heshangmai	Landrace	Ⅲ
H144	Nuomai	Landrace	Ⅲ
H145	Mangxiaomai	Landrace	Ⅲ
H146	Sankecun	Landrace	Ⅲ
H147	Paozimai	Landrace	Ⅲ
H148	Baiyoumai	Landrace	Ⅵ
H149	Yangmai	Landrace	Ⅵ
H150	Dunhuachunmai	Landrace	Ⅵ
H151	Huoqiu	Landrace	Ⅵ
H152	Daqingmang	Landrace	Ⅵ
H153	Guangtou	Landrace	Ⅵ
H154	Chaoanxiaomai	Landrace	Ⅴ
H155	Chike	Landrace	Ⅴ
H156	Songruimai	Landrace	Ⅴ
H157	Shengen	Landrace	Ⅴ
H158	Shanglinxiaomai	Landrace	Ⅴ
H159	Baimangmai	Landrace	Ⅱ
H160	Huangguaxian	Landrace	Ⅱ
H161	Banjiemang	Landrace	Ⅱ
H162	Laolaixia	Landrace	Ⅱ
H163	Kulouding	Landrace	Ⅱ
H164	Xishanbiansui	Landrace	Ⅱ
H165	Honggoudou	Landrace	Ⅱ
H166	Baihuomai	Landrace	Ⅱ
H167	Sanyuehuang	Landrace	Ⅱ
H168	Hongqiangchang	Landrace	Ⅱ
H169	Youzimai	Landrace	Ⅱ
H170	Pingyuan 50	Landrace	Ⅱ
H171	Baibiansui	Landrace	Ⅱ
H172	Baiqimai	Landrace	Ⅱ
H173	Baituzitou	Landrace	Ⅱ
H174	Youmangsaogudan	Landrace	Ⅱ
H175	Fuyanghong	Landrace	Ⅱ
H176	Mazhamai	Landrace	Ⅱ
H177	Qiangchangmai	Landrace	Ⅱ
H178	Huomai	Landrace	Ⅱ
H179	Meiqianwu	Landrace	Ⅱ
H180	Jianmai	Landrace	Ⅱ
H181	Sanyuehuang	Landrace	Ⅱ
H182	Xiaofuoshou	Landrace	Ⅱ
H183	Hongheshangtou	Landrace	Ⅱ
H184	Dakoumai	Landrace	Ⅱ
H185	Tumangmai	Landrace	Ⅱ
H186	Baitiaoyu	Landrace	Ⅱ
H187	Baimangmai	Landrace	Ⅱ
H188	Dayuhua	Landrace	Ⅱ
H189	Fumai	Landrace	Ⅱ
H190	Laoqimai	Landrace	Ⅱ
H191	Chushanbao	Landrace	Ⅱ
H192	Zijiehong	Landrace	Ⅱ
H193	dalibanmang	Landrace	Ⅱ
H194	Liuyuehuang	Landrace	Ⅸ
H195	Gejiaxiang	Landrace	Ⅸ
H196	Geerhongmai	Landrace	Ⅸ
H197	Dachunbaisilengmai (2)	Landrace	Ⅸ
H198	Bailanghuimai	Landrace	Ⅸ
H199	Bendihuanghuamai	Landrace	Ⅸ
H200	Zhahong	Landrace	Ⅸ
H201	Motuoxiaomai	Landrace	Ⅸ
H202	Bianbachunmai-6	Landrace	Ⅸ
H203	Baimangxiaomai	Landrace	Ⅸ
H204	Wujiangzhuo	Landrace	Ⅸ
H205	Muzongzhuoga	Landrace	Ⅸ
H206	Kangdingxiaomai	Landrace	Ⅸ
H207	Shanmai	Landrace	Ⅷ
H208	Yizhimai	Landrace	Ⅷ
H209	Dabaimai	Landrace	Ⅷ
H210	Galaohan	Landrace	Ⅷ
H211	Huoliyan	Landrace	Ⅷ
H212	Shanmai	Landrace	Ⅷ
H213	Hongtuzi	Landrace	Ⅷ
H214	Baidatou	Landrace	Ⅷ
H215	Jinhuangmai	Landrace	Ⅷ
H216	Hongmangmai	Landrace	Ⅷ
H217	Dabaimai	Landrace	Ⅷ
H218	Baiqitou	Landrace	Ⅷ
H219	Baimazha	Landrace	Ⅷ
H220	Laotutou	Landrace	Ⅷ
H221	Tongjiabaxiaomai	Landrace	Ⅳ
H222	Honghuamai	Landrace	Ⅳ
H223	Baimaizi	Landrace	Ⅳ
H224	Chengduguangtou	Landrace	Ⅳ
H225	Jiangmai	Landrace	Ⅳ
H226	Baihuamai	Landrace	Ⅳ
H227	Huanxiangguo	Landrace	Ⅳ
H228	Hanzhongbai	Landrace	Ⅳ
H229	Xiaosanyuehuang	Landrace	Ⅳ
H230	Suotiaohongmai	Landrace	Ⅳ
H231	Hongxumai	Landrace	Ⅳ
H232	Zipi	Landrace	Ⅳ
H233	Baimangmai	Landrace	Ⅳ
H234	Hongmangzi	Landrace	Ⅳ
H235	Yuqiumai	Landrace	Ⅳ
H236	Yangmai	Landrace	Ⅳ
H237	Yangmai	Landrace	Ⅳ
H238	Zhushimai	Landrace	Ⅳ
H239	Biantouguangkemai	Landrace	Ⅳ
H240	Changmangshibiantou	Landrace	Ⅳ
H241	Zhugoumai	Landrace	Ⅳ
H242	Dianxihongkeyangmai	Landrace	Ⅳ
H243	Baidongmai	Landrace	Ⅹ
H244	Hongchunmai	Landrace	Ⅹ
H245	Chunmai	Landrace	Ⅹ
H246	Hongdongmai	Landrace	Ⅹ
H247	Hongdongmai	Landrace	Ⅹ
H248	Wumangchunmai	Landrace	Ⅹ
H249	Hongchunmai	Landrace	Ⅹ
H250	Hongjinbaoyin	Landrace	Ⅹ
H251	Hongdongmai	Landrace	Ⅹ
H252	Wumangchunmai	Landrace	Ⅹ
H253	Chinese Spring	Landrace	Ⅳ
H254	Dingxian 72	Modern cultivar	Ⅰ
H255	Huabei 672	Modern cultivar	Ⅰ
H256	Beijing 8	Modern cultivar	Ⅰ
H257	Beijing 15	Modern cultivar	Ⅰ
H258	Nongda 139	Modern cultivar	Ⅰ
H259	Nongda 183	Modern cultivar	Ⅰ
H260	Nongda 311	Modern cultivar	Ⅰ
H261	Dongfanghong 3	Modern cultivar	Ⅰ
H262	Keyi 23	Modern cultivar	Ⅰ
H263	Jingnong 94-32	Modern cultivar	Ⅰ
H264	Jingnong 81-49	Modern cultivar	Ⅰ
H265	Jinghua 1	Modern cultivar	Ⅰ
H266	Beinongda BL8	Modern cultivar	Ⅰ
H267	Hebuyu 6068	Modern cultivar	Ⅰ
H268	Jinghe 91-P19	Modern cultivar	Ⅰ
H269	Jingnong 86-89	Modern cultivar	Ⅰ
H270	Kecheng 1	Modern cultivar	Ⅰ
H271	Xiaoshan 8	Modern cultivar	Ⅰ
H272	Jingpin 12	Modern cultivar	Ⅰ
H273	Pindong 904110-3	Modern cultivar	Ⅰ
H274	Pinkang 244	Modern cultivar	Ⅰ
H275	Yuandong 821	Modern cultivar	Ⅰ
H276	Yuandong 822	Modern cultivar	Ⅰ
H277	Fengkang 2	Modern cultivar	Ⅰ
H278	Fengkang 8	Modern cultivar	Ⅰ
H279	An 85 Zhong 124-1	Modern cultivar	Ⅰ
H280	Qiaoliang BW41	Modern cultivar	Ⅰ
H281	Zhongda 89-60192-2	Modern cultivar	Ⅰ
H282	Beijing 8694	Modern cultivar	Ⅰ
H283	Zhongyou 9507	Modern cultivar	Ⅰ
H284	Lang 8302	Modern cultivar	Ⅰ
H285	Jimai 17	Modern cultivar	Ⅰ
H286	Tang 85-5032	Modern cultivar	Ⅰ
H287	Tang 78042	Modern cultivar	Ⅰ
H288	Henong 3	Modern cultivar	Ⅰ
H289	Taifu 1	Modern cultivar	Ⅰ
H290	Jinmai 8	Modern cultivar	Ⅰ
H291	Jinmai 16	Modern cultivar	Ⅰ
H292	Jinmai 31	Modern cultivar	Ⅰ
H293	Jin 3052-5	Modern cultivar	Ⅰ
H294	Jinzhong 103	Modern cultivar	Ⅰ
H295	Changzhi 5557	Modern cultivar	Ⅰ
H296	Changzhi 6406	Modern cultivar	Ⅰ
H297	Lvhan 328	Modern cultivar	Ⅰ
H298	Jinmai 11	Modern cultivar	Ⅰ
H299	Taiyuan 351	Modern cultivar	Ⅰ
H300	Jin 1410	Modern cultivar	Ⅰ
H301	Mingxian 169	Modern cultivar	Ⅰ
H302	Gongnong 4	Modern cultivar	Ⅰ
H303	Taiyuan 2112	Modern cultivar	Ⅰ
H304	Yanan 11	Modern cultivar	Ⅰ
H305	Yanan 18	Modern cultivar	Ⅰ
H306	Pingliang 30	Modern cultivar	Ⅰ
H307	Xifeng 16	Modern cultivar	Ⅰ
H308	Pingliang 32	Modern cultivar	Ⅰ
H309	Qingshui 15-41(2)	Modern cultivar	Ⅰ
H310	Shite 14	Modern cultivar	Ⅱ
H311	Shijiazhuang 407	Modern cultivar	Ⅱ
H312	Shijiazhuang 4	Modern cultivar	Ⅱ
H313	Shijiazhuang 34	Modern cultivar	Ⅱ
H314	Shijiazhuang 54	Modern cultivar	Ⅱ
H315	Zaoxinshi	Modern cultivar	Ⅱ
H316	Pin 39	Modern cultivar	Ⅱ
H317	Jimai 23	Modern cultivar	Ⅱ
H318	Shi 82-5201	Modern cultivar	Ⅱ
H319	Cangzhou 1	Modern cultivar	Ⅱ
H320	12040	Modern cultivar	Ⅱ
H321	Hengshui 7004	Modern cultivar	Ⅱ
H322	Hengdalihong	Modern cultivar	Ⅱ
H323	Ji 93C6 156-2	Modern cultivar	Ⅱ
H324	Jimai 20	Modern cultivar	Ⅱ
H325	Gaobi-13	Modern cultivar	Ⅱ
H326	Jimai 14	Modern cultivar	Ⅱ
H327	Jimai 19	Modern cultivar	Ⅱ
H328	Jishi 5032	Modern cultivar	Ⅱ
H329	Han 4564	Modern cultivar	Ⅱ
H330	1817	Modern cultivar	Ⅱ
H331	Maijin 1	Modern cultivar	Ⅱ
H332	Jinyang 1045	Modern cultivar	Ⅱ
H333	Jinmai 20	Modern cultivar	Ⅱ
H334	Jin 865096	Modern cultivar	Ⅱ
H335	Jinmai 37	Modern cultivar	Ⅱ
H336	Linyuan 129	Modern cultivar	Ⅱ
H337	Pingyang 27	Modern cultivar	Ⅱ
H338	Qida 195	Modern cultivar	Ⅱ
H339	Jinan 2	Modern cultivar	Ⅱ
H340	Jinan 9	Modern cultivar	Ⅱ
H341	Youbao	Modern cultivar	Ⅱ
H342	Huangtai 103	Modern cultivar	Ⅱ
H343	Taishan 1	Modern cultivar	Ⅱ
H344	Taishan 4	Modern cultivar	Ⅱ
H345	Jinan 17	Modern cultivar	Ⅱ
H346	Lumai 22	Modern cultivar	Ⅱ
H347	Jimai 19	Modern cultivar	Ⅱ
H348	Lumai 10	Modern cultivar	Ⅱ
H349	Lainongpinxi 22	Modern cultivar	Ⅱ
H350	Laizhou 953	Modern cultivar	Ⅱ
H351	Lumai 1	Modern cultivar	Ⅱ
H352	Lumai 5	Modern cultivar	Ⅱ
H353	Shannong PH85-4	Modern cultivar	Ⅱ
H354	Lunong 784081	Modern cultivar	Ⅱ
H355	Lunong 86(5)174	Modern cultivar	Ⅱ
H356	Luzi 0863169	Modern cultivar	Ⅱ
H357	Luzi 0884142	Modern cultivar	Ⅱ
H358	Taishan 7	Modern cultivar	Ⅱ
H359	Teng 80-1-2	Modern cultivar	Ⅱ
H360	Changwei 20	Modern cultivar	Ⅱ
H361	Yanzhong 144	Modern cultivar	Ⅱ
H362	Yannong 3	Modern cultivar	Ⅱ
H363	Yannong 15	Modern cultivar	Ⅱ
H364	Lumai 7	Modern cultivar	Ⅱ
H365	Lumai 9	Modern cultivar	Ⅱ
H366	Neixiang 5	Modern cultivar	Ⅱ
H367	Anxuan 2	Modern cultivar	Ⅱ
H368	Zhengzhou 6	Modern cultivar	Ⅱ
H369	Bonong 7023	Modern cultivar	Ⅱ
H370	Mengxian 2	Modern cultivar	Ⅱ
H371	Wan 7107	Modern cultivar	Ⅱ
H372	Yumai 18	Modern cultivar	Ⅱ
H373	Yumai 54	Modern cultivar	Ⅱ
H374	Bainong 3217	Modern cultivar	Ⅱ
H375	Yumai 2	Modern cultivar	Ⅱ
H376	Lankao 906	Modern cultivar	Ⅱ
H377	Yuanzhu 55	Modern cultivar	Ⅱ
H378	Zhengzhou 8761	Modern cultivar	Ⅱ
H379	Yumai 14	Modern cultivar	Ⅱ
H380	Zhengzhou 4	Modern cultivar	Ⅱ
H381	Yu 7106-0-22-1-3-2B	Modern cultivar	Ⅱ
H382	Zhengzhou 741	Modern cultivar	Ⅱ
H383	Hua 852895-2	Modern cultivar	Ⅱ
H384	Yu 30691-1-3	Modern cultivar	Ⅱ
H385	Zheng 87305-0-13	Modern cultivar	Ⅱ
H386	Zhengzi R84019-0-7-4-0-1	Modern cultivar	Ⅱ
H387	Wenmai 6	Modern cultivar	Ⅱ
H388	Yumai 7	Modern cultivar	Ⅱ
H389	Anmai 95 Zhong 35	Modern cultivar	Ⅱ
H390	Jingyang 60	Modern cultivar	Ⅱ
H391	Bima 1	Modern cultivar	Ⅱ
H392	Bima 4	Modern cultivar	Ⅱ
H393	Shannong 9	Modern cultivar	Ⅱ
H394	Xinong 6028	Modern cultivar	Ⅱ
H395	Fengchan 3	Modern cultivar	Ⅱ
H396	Jinguangmai	Modern cultivar	Ⅱ
H397	Aifeng 3	Modern cultivar	Ⅱ
H398	Xiaoyan 4	Modern cultivar	Ⅱ
H399	Jingyang 30	Modern cultivar	Ⅱ
H400	Baomai 3	Modern cultivar	Ⅱ
H401	Baomai 5	Modern cultivar	Ⅱ
H402	Qinmai 8	Modern cultivar	Ⅱ
H403	Liken 2	Modern cultivar	Ⅱ
H404	Shan 8786-0-3	Modern cultivar	Ⅱ
H405	Shan 70-1	Modern cultivar	Ⅱ
H406	Shannong 7859	Modern cultivar	Ⅱ
H407	Shannong 229	Modern cultivar	Ⅱ
H408	Fuzhuang 30	Modern cultivar	Ⅱ
H409	Qinmai 3	Modern cultivar	Ⅱ
H410	Fen 22	Modern cultivar	Ⅱ
H411	Xiannong 39	Modern cultivar	Ⅱ
H412	Xiannong 151	Modern cultivar	Ⅱ
H413	Shan 7219-8-11-2-1	Modern cultivar	Ⅱ
H414	Xiaoyan 6	Modern cultivar	Ⅱ
H415	Gaoyou 503	Modern cultivar	Ⅱ
H416	Ningfengmai	Modern cultivar	Ⅱ
H417	Huaimai 11	Modern cultivar	Ⅱ
H418	Huaimai 12	Modern cultivar	Ⅱ
H419	Xuzhou 19	Modern cultivar	Ⅱ
H420	Xuzhou 21	Modern cultivar	Ⅱ
H421	Xuzhou 22	Modern cultivar	Ⅱ
H422	Bu 84111	Modern cultivar	Ⅱ
H423	Wo 80	Modern cultivar	Ⅱ
H424	Xiaonong 76189	Modern cultivar	Ⅱ
H425	Zhangdong 29	Modern cultivar	Ⅱ
H426	Pingliang 35	Modern cultivar	Ⅱ
H427	Wanyuan 28 Dali	Modern cultivar	Ⅲ
H428	Anhui 11	Modern cultivar	Ⅲ
H429	Anhui 3	Modern cultivar	Ⅲ
H430	Mengfeng 8	Modern cultivar	Ⅲ
H431	Anhui 9	Modern cultivar	Ⅲ
H432	Wanpin 8203	Modern cultivar	Ⅲ
H433	Wan 85-50-Fan3	Modern cultivar	Ⅲ
H434	Wan 89193	Modern cultivar	Ⅲ
H435	Wanpin 8337	Modern cultivar	Ⅲ
H436	Wanpin 8410	Modern cultivar	Ⅲ
H437	Huadong 6	Modern cultivar	Ⅲ
H438	Siyang 117	Modern cultivar	Ⅲ
H439	Sumai 3	Modern cultivar	Ⅲ
H440	Wangmai 17	Modern cultivar	Ⅲ
H441	Kang R16	Modern cultivar	Ⅲ
H442	Ningmaizi 44	Modern cultivar	Ⅲ
H443	Yangmai 158	Modern cultivar	Ⅲ
H444	Huadong 10	Modern cultivar	Ⅲ
H445	Ning 8343	Modern cultivar	Ⅲ
H446	Ning 8537	Modern cultivar	Ⅲ
H447	Ningmaizi 3	Modern cultivar	Ⅲ
H448	Ningmaizi 13	Modern cultivar	Ⅲ
H449	Ning 8924	Modern cultivar	Ⅲ
H450	Ningmaizi 19	Modern cultivar	Ⅲ
H451	Sujian 14	Modern cultivar	Ⅲ
H452	Nanda 8910	Modern cultivar	Ⅲ
H453	Nannong 2293xuan	Modern cultivar	Ⅲ
H454	Liying 1	Modern cultivar	Ⅲ
H455	Liying 5	Modern cultivar	Ⅲ
H456	Zhongshan 9	Modern cultivar	Ⅲ
H457	Jiulan	Modern cultivar	Ⅲ
H458	Zhemai 1	Modern cultivar	Ⅲ
H459	Limai 16	Modern cultivar	Ⅲ
H460	Jiamai 25	Modern cultivar	Ⅲ
H461	Nanzhongzao	Modern cultivar	Ⅲ
H462	Zhemai 4	Modern cultivar	Ⅲ
H463	Zhexuan 78-23	Modern cultivar	Ⅲ
H464	Emai 6	Modern cultivar	Ⅲ
H465	Jingzhou 2	Modern cultivar	Ⅲ
H466	Exi 84-1031	Modern cultivar	Ⅲ
H467	Exi 652	Modern cultivar	Ⅲ
H468	Enmai 4	Modern cultivar	Ⅲ
H469	E 811	Modern cultivar	Ⅲ
H470	Yimai 1	Modern cultivar	Ⅲ
H471	Yixi 102	Modern cultivar	Ⅲ
H472	Xiangmai 8	Modern cultivar	Ⅲ
H473	Xiangmai 12	Modern cultivar	Ⅲ
H474	Zhongjiwan	Modern cultivar	Ⅲ
H475	Xiang 791-2	Modern cultivar	Ⅲ
H476	Zhongana 875	Modern cultivar	Ⅲ
H477	Gan 162	Modern cultivar	Ⅲ
H478	Hechang 45	Modern cultivar	Ⅳ
H479	Shuwan 8	Modern cultivar	Ⅳ
H480	Sichuan 51	Modern cultivar	Ⅳ
H481	Chuanmai 10	Modern cultivar	Ⅳ
H482	Chuanmai 19	Modern cultivar	Ⅳ
H483	Chuanmai 22	Modern cultivar	Ⅳ
H484	Yaanzao	Modern cultivar	Ⅳ
H485	Fan 6	Modern cultivar	Ⅳ
H486	Hongai 1	Modern cultivar	Ⅳ
H487	Xichangfanxiumai	Modern cultivar	Ⅳ
H488	Chuanyu 12	Modern cultivar	Ⅳ
H489	Mianyang 11	Modern cultivar	Ⅳ
H490	Mianyang 26	Modern cultivar	Ⅳ
H491	Chuan 83C-1001	Modern cultivar	Ⅳ
H492	Chuan 7911	Modern cultivar	Ⅳ
H493	Xichang 5548-9	Modern cultivar	Ⅳ
H494	Pan 86001-3	Modern cultivar	Ⅳ
H495	Pan 88080-3-1-1	Modern cultivar	Ⅳ
H496	Bimai 10	Modern cultivar	Ⅳ
H497	Bimai 13	Modern cultivar	Ⅳ
H498	Bimai 26	Modern cultivar	Ⅳ
H499	Xingzhuai 3	Modern cultivar	Ⅳ
H500	Qianjian 28	Modern cultivar	Ⅳ
H501	Guinong 10	Modern cultivar	Ⅳ
H502	Guinong Y13	Modern cultivar	Ⅳ
H503	Gui 775	Modern cultivar	Ⅳ
H504	Xingyingwu 3	Modern cultivar	Ⅳ
H505	Kenguia 1	Modern cultivar	Ⅳ
H506	Xingyi 4	Modern cultivar	Ⅳ
H507	Hemai 8052	Modern cultivar	Ⅳ
H508	Yunmai 28	Modern cultivar	Ⅳ
H509	Yunmai 29	Modern cultivar	Ⅳ
H510	Yunmai 33	Modern cultivar	Ⅳ
H511	Yunmai 34	Modern cultivar	Ⅳ
H512	Fengmai 11	Modern cultivar	Ⅳ
H513	Nanyuan 1	Modern cultivar	Ⅳ
H514	Jingmai 2	Modern cultivar	Ⅳ
H515	Pu 170	Modern cultivar	Ⅳ
H516	Dian 622-525-2	Modern cultivar	Ⅳ
H517	Dian 8613	Modern cultivar	Ⅳ
H518	Kangxiu 10	Modern cultivar	Ⅴ
H519	Dixiuzao	Modern cultivar	Ⅴ
H520	Jinmai 2148	Modern cultivar	Ⅴ
H521	Longxi 35	Modern cultivar	Ⅴ
H522	Fufan 904	Modern cultivar	Ⅴ
H523	Yuanshan	Modern cultivar	Ⅴ
H524	Taizhongxuan 2	Modern cultivar	Ⅴ
H525	Taizhong 23	Modern cultivar	Ⅴ
H526	Dongnong 101	Modern cultivar	Ⅵ
H527	Hezuo 3	Modern cultivar	Ⅵ
H528	Hei 78-1259	Modern cultivar	Ⅵ
H529	Heifu 84S1378	Modern cultivar	Ⅵ
H530	Jia 6268A-549	Modern cultivar	Ⅵ
H531	Jia 84-S437	Modern cultivar	Ⅵ
H532	Kefeng 3	Modern cultivar	Ⅵ
H533	Kelao 4	Modern cultivar	Ⅵ
H534	Kequn	Modern cultivar	Ⅵ
H535	Kenbei 1	Modern cultivar	Ⅵ
H536	Kenda 1	Modern cultivar	Ⅵ
H537	Kenhong 15	Modern cultivar	Ⅵ
H538	Long 79-9468	Modern cultivar	Ⅵ
H539	Longfumai 2	Modern cultivar	Ⅵ
H540	Longmai 18	Modern cultivar	Ⅵ
H541	Longmai 19	Modern cultivar	Ⅵ
H542	Xinkehan 9	Modern cultivar	Ⅵ
H543	Xinshuguang 1	Modern cultivar	Ⅵ
H544	Xinshuguang 6	Modern cultivar	Ⅵ
H545	Fengqiang 3	Modern cultivar	Ⅵ
H546	Jichun 1016	Modern cultivar	Ⅵ
H547	Xiaobingmai 33	Modern cultivar	Ⅵ
H548	Jinghong 5	Modern cultivar	Ⅶ
H549	Pinchun 14	Modern cultivar	Ⅶ
H550	Jiba 7529	Modern cultivar	Ⅶ
H551	Jichun 8055-1	Modern cultivar	Ⅶ
H552	Yanbei 8	Modern cultivar	Ⅶ
H553	Jinchun 3	Modern cultivar	Ⅶ
H554	Lianglaiyoubaipixiaomai	Modern cultivar	Ⅶ
H555	Bihongsui	Modern cultivar	Ⅶ
H556	Neimai 11	Modern cultivar	Ⅶ
H557	Ganmai 6	Modern cultivar	Ⅷ
H558	Ganmai 8	Modern cultivar	Ⅷ
H559	Longchun 7	Modern cultivar	Ⅷ
H560	Dingxi 24	Modern cultivar	Ⅷ
H561	Linnong 12	Modern cultivar	Ⅷ
H562	Jinmai 4	Modern cultivar	Ⅷ
H563	Wudu 5	Modern cultivar	Ⅷ
H564	Longdong 1	Modern cultivar	Ⅷ
H565	Xifeng 9	Modern cultivar	Ⅷ
H566	Xifeng 10	Modern cultivar	Ⅷ
H567	Qingfeng 1	Modern cultivar	Ⅷ
H568	Zhangchun 9	Modern cultivar	Ⅷ
H569	Ganmai 46	Modern cultivar	Ⅷ
H570	Huining 5	Modern cultivar	Ⅷ
H571	Huining 10	Modern cultivar	Ⅷ
H572	Wuchun 1	Modern cultivar	Ⅷ
H573	Jinmai 303	Modern cultivar	Ⅷ
H574	Gan Tal21-10-2	Modern cultivar	Ⅷ
H575	Gan 8221-1-1	Modern cultivar	Ⅷ
H576	Gan 8358-2	Modern cultivar	Ⅷ
H577	Hongtu	Modern cultivar	Ⅷ
H578	Ningchun 4	Modern cultivar	Ⅷ
H579	Shi 886	Modern cultivar	Ⅷ
H580	Ning 87N2801	Modern cultivar	Ⅷ
H581	Jian 72	Modern cultivar	Ⅷ
H582	Xiangnong 3	Modern cultivar	Ⅷ
H583	Gaoyuan 506	Modern cultivar	Ⅷ
H584	Huzhuhong	Modern cultivar	Ⅷ
H585	Qingchun 25	Modern cultivar	Ⅷ
H586	Qingchun 28	Modern cultivar	Ⅷ
H587	Gaoyuan 338	Modern cultivar	Ⅷ
H588	Gaoyuan 602	Modern cultivar	Ⅷ
H589	Zangdong 4	Modern cultivar	Ⅸ
H590	Rikaze 7	Modern cultivar	Ⅸ
H591	Rikaze 8	Modern cultivar	Ⅸ
H592	Rikaze 54	Modern cultivar	Ⅸ
H593	Xindong 2	Modern cultivar	Ⅹ
H594	Changdong 5	Modern cultivar	Ⅹ
H595	Kashi 1	Modern cultivar	Ⅹ
H596	Kashibaipi	Modern cultivar	Ⅹ
H597	Tuokexun 1	Modern cultivar	Ⅹ
H598	Tuchun 6	Modern cultivar	Ⅹ
H599	Xinchun 2	Modern cultivar	Ⅹ
H600	Jiudong 2	Modern cultivar	Ⅹ
H601	Yinong 8	Modern cultivar	Ⅹ

## Sheet: Supplementary Table 2
	Table S2 Primer sequence, Purpose and PCR conditions
	Primer Name	Nucleotide Sequence (5`-3`)	Fragment length	Purpose	PCR conditions
	TaActin-F	CTCCCTCACAACAACAACCGC		As an internal control for qPCR experiment for Chinese Spring
	TaActin-R	TACCAGGAACTTCCATACCAAC
	Tubulin-F	TGAGGACTGGTGCTTACCGC		As an internal control for qPCR experiment for Transgenic Rice	Preincubation at 95 °C for 3 min, followed by 2 step amplification phase: 95 °C for 10 s and 60 °C for 1 min, followed by 3 step Melting phase: 95 °C for 10 s, 65 °C for 1 min and 97 °C for 1 s
	Tubulin-R	GCACCATCAAACCTCAGGGA
	cDNA-F	ATGGCAGACCACCTTCAAGT		cDNA amplification primers for transgenic rice
	cDNA-R	GTAGTTCCACATGCCATCCA
	qPCR-TaNAC020-A-F	GGCATGAAGAAGACGCTCG		qPCR for A genome in Chinese spring	Preincubation at 95 °C for 3 min, followed by 2 step amplification phase: 95 °C for 10 s and 60 °C for 1 min, followed by 3 step Melting phase: 95 °C for 10 s, 65 °C for 1 min and 97 °C for 1 s
	qPCR-TaNAC020-A-R	TTTGGCGATGTCAGCAGGC
	qPCR-TaNAC020-B-F	TCATTCTACAACCAACACCAGC		qPCR for B genome in Chinese spring	Preincubation at 95 °C for 3 min, followed by 2 step amplification phase: 95 °C for 10 s and 60 °C for 1 min, followed by 3 step Melting phase: 95 °C for 10 s, 65 °C for 1 min and 97 °C for 1 s
	qPCR-TaNAC020-B-R	CAACCAGATCACAGCATCCTCA
	qPCR-TaNAC020-D-F	CATCTCCATTCCTGTCCCCATC		qPCR for D genome in Chinese spring	Preincubation at 95 °C for 3 min, followed by 2 step amplification phase: 95 °C for 10 s and 60 °C for 1 min, followed by 3 step Melting phase: 95 °C for 10 s, 65 °C for 1 min and 97 °C for 1 s
	qPCR-TaNAC020-D-R	TGACGTTAATGTCCAGCTCCG
	M13-F	TGTAAAACGACGGCCAGT		Universal sequence walking primer used for TaNAC-7A/7B/7D
	M-13R	CAGGAAACAGCTATGACC
	TaNAC02-A-1-F1	GTCTTGCCGGTGCACGCATTAGCTC	2009bp	"A" genome genomic region amplification primer to detect DNA polymorphism studies	95 °C for 5 min; 35 cycles of 95 °C for 30 s, 61 °C for 35 s, 72 °C extension for 2 min; followed by a final extension of 72 °C for 10 min
	TaNAC02-A-1-R1	GTTGCTGTCCTACAAAACTCTACAC
	Seq-020-A-1-F	GACTCAAGAGCGGTAAGCA		Sequence walking primer for desired full length sequence forTaNAC7A
	TaNAC020-B-1-F	CTTCTCCCGCAAGTGTCTTGCCA	2027bp	"B" genome genomic region amplification primer for DNA polymorphism studies	95 °C for 5 min; 34 cycles of 95 °C for 30 s, 62 °C for 35 s, 72 °C extension for 2 min 30 s; followed by a final extension of 72 °C for 10 min
	TaNAC020-B-1-R	TCGTATTAGTCCAACTGTGGGCG
	Seq-020-B-1-F1	GCAAGCAACCCACACCCAACT		Sequence walking primers for "B" genome genomic region
	Seq-020-B-1-R1	ACAAGAGAAGCAAGCCAAGCA
	TaNAC020-D-1-F2	CGATGGCGAGGAGGAGAATC	2185bp	"D" genome genomic region amplification for DNA polymorphism studies	95 °C for 5 min; 34 cycles of 95 °C for 30 s, 58 °C for 30 s, 72 °C extension for 2 min; followed by a final extension of 72 °C for 10 min
	TaNAC020-D-1-R2	CACCGAAAACCAACACCGAC
	Seq-020-D-1-F1	GATCAGCAAGGGGAAGCA		Sequence walking primer for "D" genome genomic region

## Sheet: Supplementary Table 3
Table S3. Basic information of individual KASP assays, primer sequences and flanking coding sequences of each gene
	Gene	Primer Name	FAM primer	HEX primer	Common primer	FAM allele	HEX allele	Direction	Dominance	Evidence	Check FAM	Check HEX	Sequence	PCR Conditions
25 ng/µl of DNA was used for each sample to do genotyping	TaNAC020-A	TaNAC020-7A- -878nt	GAAGGTGACCAAGTTCATGCTTCAATGTACTAGATTTGAGAAAGCTC	GAAGGTCGGAGTCAACGGATTTCAATGTACTAGATTTGAGAAAGCTA	ATGATGCCATCATCTGACATGTCCATTCCCATG	T	G	R	co-dominant	associated	Chinese Spring	Fielder, Aikang-58	GATGCCATCATCTGACATGTCCATTCCCATGTCCATGGGGGAAGAGAAACAACA(G/T)AGCTTTCTCAAATCTAGTACATTGATTCCTCTCATGGACTAT	Pre-PCR read at 30°C for 1 min, hot start at 95 °C for 15 min, 10 touch down cycles (95 °C for 20 s; touch down at 65 °C initially and decreasing by -1°C per cycle for 25 s), followed by 32-35 more cycles of annealing (95 °C for 15 s; 57 °C for 60 s), and post-PCR read at 30°C for 1 min
		TaNAC020-7A-612nt	GAAGGTGACCAAGTTCATGCTATGGTGGTGGCTTTGGCGATGTCAGCG	GAAGGTCGGAGTCAACGGATTATGGTGGTGGCTTtGGCGAtGTCAGCA	AGAGCGGTAAGCAACCCACACCCGG	C	T	R	co-dominant	associated	Fielder, Aikang-58	Chinese Spring	GCACGAGTACAGACTCAAGAGCGGTAAGCAACCCACACCCGGCCTGCC(C/T)GCTGACATCGCCAAAGCCACCACCATTAATGCATCTTCCAAGGTATTT	Pre-PCR read at 30°C for 1 min, hot start at 95 °C for 15 min, 10 touch down cycles (95 °C for 20 s; touch down at 65 °C initially and decreasing by -1°C per cycle for 25 s), followed by 32-35 more cycles of annealing (95 °C for 15 s; 57 °C for 60 s), and post-PCR read at 30°C for 1 min
	TaNAC020-B	TaNAC020-7B- 819nt	GAAGGTGACCAAGTTCATGCTATTTGTAGAATCTTCCTTAAGAGCAT	GAAGGTCGGAGTCAACGGATTATTTGTAGAATCTTCCTTAAGAGCAC	TCATATGATGGCATCATCACCTTCT	T	C	F	co-dominant	causal	Chinese Spring, Aikang-58	Hanxuan-10, Lumai-14	GTTGGTAGGGGGAGTATGTGATTTGTAGAATCTTCCTTAAGAGCA(T/C)TGGACTGAAGAAGGTGATGATGCCATCATATGACATGTCCATTCCCGTGTCCATGG	Pre-PCR read at 30°C for 1 min, hot start at 95 °C for 15 min, 10 touch down cycles (95 °C for 20 s; touch down at 65 °C initially and decreasing by -1°C per cycle for 25 s), followed by 32-35 more cycles of annealing (95 °C for 15 s; 57 °C for 60 s), and post-PCR read at 30°C for 1 min

## Sheet: Supplementary Table S4
Table S4 PIC and He values in studied wheat germplasm
		PIC				He
	Tetraploid (AABB)	LR-157	MC-348	Mean	Tetraploid (AABB)	LR-157	MC-348	Mean
TaNAC020-A	0.339	0.4284	0.4989	0.46365	0.3838	0.4814	0.5598	0.5206
TaNAC020-B	0.2604	0.572	0.5818	0.5769	0.3078	0.6247	0.6418	0.63325
Overall Mean		0.5002	0.54035	0.520275		0.55305	0.6008	0.576925
